# Supplementary material for: Intensive care unit depth of sleep: proof of concept of a simple electroencephalography index in the non-sedated
Source: Crit Care. 2014 Apr 9;18(2):R66. doi: 10.1186/cc13823 (PMC4057034; doi:10.1186/cc13823)
Supplement: Additional file 16 — Table S4 Agreement and sensitivity/specificity of threshold selection of IDOS index (n = 15). Classification by IDOS index is compared to R&K analysis for individual recordings of normal sleep in outpatient recordings. IDOS, ICU Depth of Sleep; R&K, Rechtschaffen and Kales. [file cc13823-S16.xls]

## Sheet: Sheet1
		Wake		Sleep		SWS
Recording	Kappa	Sensitivity	Specificity	Sensitivity	Specificity	Sensitivity	Specificity
1	0.77	0.99	0.86	0.6	0.94	0.87	0.58
2	0.74	0.82	0.88	0.83	0.74	0.86	0.95
3	0.76	0.98	1	0.84	0.62	0.65	0.84
4	0.86	0.95	0.96	0.86	0.89	0.83	0.65
5	0.90	0.98	0.96	0.83	0.82	0.75	0.95
6	0.83	0.98	0.94	0.73	0.94	0.96	0.52
7	0.73	0.84	0.93	0.82	0.74	0.71	0.7
8	0.89	0.99	0.98	0.84	0.91	0.81	0.64
9	0.76	0.91	0.89	0.72	0.82	0.8	0.31
10	0.83	0.93	0.92	0.81	0.79	0.83	0.99
11	0.86	0.96	0.94	0.81	0.84	0.78	0.82
12	0.75	0.85	0.94	0.78	0.7	0.92	0.71
13	0.92	0.99	0.97	0.87	0.93	0.89	0.86
14	0.88	0.95	0.93	0.9	0.9	0.83	0.91
15	0.79	0.86	0.92	0.86	0.77	0.82	0.91
Mean (SD)	0.82 (0.06)	93 (0.06)	93 (0.04)	81 (0.07)	82 (0.09)	82 (0.08)	76 (0.19)
